# Supplementary material
Source: PubMed Central journal article supplement (PMC3386831)
Supplement: JCI63597sd.pdf [file JCI63597sd.pdf]

**Supplementary Information For:**

**Exome Sequencing Identifies *GATA1* Mutations Resulting in Diamond-Blackfan Anemia**

Vijay G. Sankaran, Roxanne Ghazvinian, Ron Do, Prathapan Thiru, Jo-Anne Vergilio, Alan H. Beggs, Colin A. Sieff, Stuart H. Orkin, David G. Nathan, Eric S. Lander, Hanna T. Gazda

Correspondence should be addressed to E.S.L. ([lander@broadinstitute.org](mailto:lander@broadinstitute.org)) or H.T.G. ([hanna.gazda@childrens.harvard.edu](mailto:hanna.gazda@childrens.harvard.edu))

**Supplementary Table 1: Fetal Hemoglobin and Erythrocyte Adenosine Deaminase (eADA) Testing**

| <b>Individual</b>     | <b>eADA Level (EU/grams of Hb)</b> | <b>HbF (% of total hemoglobin)</b> |
|-----------------------|------------------------------------|------------------------------------|
| II-1 (at age 5 years) | 0.72                               | 8.4                                |
| I-1                   | 0.53                               | Not done                           |
| I-2                   | 0.49                               | Not done                           |
| Notes                 | Normal range is 0.33 - 0.96        | Normal range is < 1 %              |

**Supplementary Table 2: Details of Exome Sequencing in Two Siblings with DBA**

| <b>Sample</b>                                                                                                                                       | <b>Individual II-1</b> | <b>Individual II-3</b> |
|-----------------------------------------------------------------------------------------------------------------------------------------------------|------------------------|------------------------|
| No. of bait DNA bases                                                                                                                               | 44,870,454             | 44,870,454             |
| No. of target DNA bases                                                                                                                             | 32,950,014             | 32,950,014             |
| Total Reads                                                                                                                                         | 124,859,508            | 134,892,718            |
| Purity Filtered (PF) Unique Reads                                                                                                                   | 82,422,497             | 85,541,405             |
| PF Unique Reads Aligned                                                                                                                             | 75,799,490             | 78,493,355             |
| On Target Bases                                                                                                                                     | 3,035,025,577          | 3,167,638,694          |
| Fold Enrichment                                                                                                                                     | 51.39                  | 51.54                  |
| Target Bases 2x %                                                                                                                                   | 97.33                  | 97.32                  |
| Target Bases 10x %                                                                                                                                  | 93.13                  | 93.58                  |
| Target Bases 30x %                                                                                                                                  | 83.05                  | 84.31                  |
| Total SNPs                                                                                                                                          | 19,528                 | 19,607                 |
| Percentage in dbSNP                                                                                                                                 | 96.71                  | 96.57                  |
| No. of SNPs in dbSNP                                                                                                                                | 18,886                 | 18,934                 |
| <b>Identified Variants After Filtering Variants in dbSNP Build 132, 1000 Genomes Project, and 95 Exomes from NIEHS Environmental Genome Project</b> |                        |                        |
| Total Number                                                                                                                                        | 287                    | 289                    |
| Silent                                                                                                                                              | 99                     | 90                     |
| Missense                                                                                                                                            | 188                    | 197                    |
| Nonsense                                                                                                                                            | 0                      | 2                      |
| Readthrough                                                                                                                                         | 0                      | 0                      |

**Supplementary Table 3: Summary of Genotyping in the DBA Family  
(Variants are highlighted in yellow and genotyping failures are highlighted in red)**

| Gene      | Ref #        | Variant pos.(hg19 coordinates) | REF | ALT | I-1                 | I-2                 | II-1                | II-2                | II-3                |
|-----------|--------------|--------------------------------|-----|-----|---------------------|---------------------|---------------------|---------------------|---------------------|
| PLB1      | NM_001170585 | 28843138                       | G   | C   | G/C                 | G/G                 | G/C                 | G/C                 | G/C                 |
| TTC27     | NM_001193509 | 33012179                       | G   | A   | G/A                 | G/G                 | G/A                 | G/A                 | G/A                 |
| NEB       | NM_001164507 | 152432756                      | T   | C   | T/T                 | T/C                 | T/C                 | T/C                 | T/C                 |
| ACVR1C    | NM_001111031 | 158390548                      | C   | T   | C/T                 | C/T                 | C/T                 | C/T                 | C/T                 |
| POC1A     | NM_001161580 | 52179931                       | C   | T   | C/C                 | C/T                 | C/T                 | C/T                 | C/T                 |
| CYP21A2   | NM_000500    | 32008783                       | C   | T   | G/C                 | G/G                 | G/C                 | G/G                 | G/C                 |
| SYNE1     | NM_033071    | 152652136                      | C   | T   | C/T                 | C/T                 | C/T                 | C/T                 | C/T                 |
| PDLIM2    | NM_0241630   | 22447111                       | T   | C   | T/C                 | T/T                 | T/C                 | T/C                 | T/C                 |
| FAM129B   | NM_001035534 | 130272445                      | C   | T   | C/T                 | C/C                 | C/T                 | C/C                 | C/T                 |
| CDHR1     | NM_001171971 | 85961593                       | C   | T   | C/C                 | C/T                 | C/T                 | C/T                 | C/T                 |
| C10orf125 | NM_001098483 | 135168915                      | T   | G   | T/T                 | T/G                 | T/G                 | T/G                 | T/G                 |
| ART5      | NM_001079536 | 3660256                        | C   | A   | C/A                 | C/C                 | C/A                 | C/A                 | C/A                 |
| CACNA1H   | NM_001005407 | 1254048                        | G   | T   | G/T                 | G/G                 | G/T                 | G/T                 | G/T                 |
| PDPK1     | NM_002613    | 2607963                        | C   | T   | C/C                 | C/T                 | C/T                 | C/T                 | C/T                 |
| MVP       | NM_005115    | 29859222                       | G   | T   | G/T                 | G/G                 | G/T                 | G/G                 | G/T                 |
| CNTR0B    | NM_001037144 | 7852817                        | G   | A   | G/A                 | G/G                 | G/A                 | G/G                 | G/A                 |
| NCOR1     | NM_001190440 | 15967434                       | C   | G   | C/G                 | C/C                 | C/G                 | C/C                 | C/G                 |
| C17orf70  | NM_025161    | 79514391                       | C   | T   | C/T                 | C/C                 | C/T                 | C/C                 | C/T                 |
| SLA2      | NM_032214    | 35262950                       | G   | T   | G/G                 | G/T                 | G/T                 | G/G                 | G/T                 |
| RFPL3     | NM_001098535 | 32754252                       | A   | G   | variant not present |
| ESPN      | NM_031475    | 6505817                        | C   | T   | C/T                 | C/T                 | C/T                 | C/T                 | C/T                 |
| CPT2      | NM_000098    | 53676371                       | T   | C   | T/T                 | T/C                 | T/C                 | T/C                 | T/C                 |
| FLG       | NM_002016    | 152276050                      | C   | A   | C/C                 | C/A                 | C/A                 | C/A                 | C/A                 |
| FLG       | NM_002016    | 152276545                      | G   | A   | G/G                 | G/A                 | G/A                 | G/A                 | G/A                 |
| FCRL2     | NM_030764    | 157736647                      | G   | A   | G/G                 | G/A                 | G/A                 | G/A                 | G/A                 |
| F13B      | NM_001994    | 197026161                      | G   | C   | G/C                 | G/G                 | G/C                 | G/G                 | G/C                 |
| PLEKHH2   | NM_172069    | 43922319                       | A   | G   | A/A                 | A/G                 | A/G                 | A/A                 | A/G                 |
| DOCK10    | NM_014689    | 225710038                      | C   | A   | C/C                 | C/A                 | C/A                 | C/A                 | C/A                 |
| ARPP21    | NM_016300    | 35833886                       | T   | C   | T/T                 | T/C                 | T/C                 | T/T                 | T/C                 |
| IFRD2     | NM_006764    | 50326254                       | G   | A   | G/A                 | G/G                 |                     |                     |                     |
| DNAH1     | NM_015512    | 52400807                       | G   | T   | G/T                 | G/G                 | G/T                 | G/G                 | G/T                 |
| DNAH1     | NM_015512    | 52425264                       | A   | G   | A/A                 | A/G                 | A/G                 | A/A                 | A/G                 |
| LEKR1     | NM_001004316 | 156710978                      | A   | G   | A/G                 | A/A                 | A/G                 | A/A                 | A/G                 |
| NLGN1     | NM_014932    | 173998740                      | G   | T   | G/T                 | G/G                 | G/T                 | G/G                 | G/T                 |
| SLC25A31  | NM_031291    | 128651703                      | G   | T   | G/G                 | G/T                 | G/T                 | G/T                 | G/T                 |
| C4orf45   | NM_152543    | 159894418                      | G   | T   | G/T                 | G/G                 | G/T                 | G/T                 | G/T                 |
| GALNT7    | NM_017423    | 174090089                      | C   | T   | C/T                 | C/C                 | C/T                 | C/T                 | C/T                 |
| SCGB3A2   | NM_054023    | 147261026                      | A   | C   | A/C                 | A/A                 | A/A                 | A/C                 | A/C                 |
| NUP153    | NM_005124    | 17616339                       | G   | A   | G/A                 | G/G                 | G/A                 | G/G                 | G/A                 |
| HIST1H2BG | NM_003518    | 26216600                       | G   | A   | G/A                 | G/G                 | G/A                 | G/G                 | G/A                 |
| ZSCAN16   | NM_025231    | 28097614                       | G   | C   | G/G                 | G/C                 | G/C                 | G/G                 | G/C                 |
| NKAPL     | NM_001007531 | 28227993                       | G   | A   | G/G                 | G/A                 | G/A                 | G/G                 | G/A                 |
| TNXB      | NM_019105    | 32038017                       | T   | C   | T/C                 | T/T                 | T/C                 | T/T                 | T/C                 |
| TREML2    | NM_024807    | 41162551                       | T   | A   | T/A                 | T/T                 | T/A                 | T/T                 | T/A                 |
| KHDRBS2   | NM_152688    | 62407136                       | C   | T   | C/T                 | C/C                 | C/T                 | C/C                 | C/T                 |
| TRDN      | NM_006073    | 123673686                      | T   | C   | T/T                 | T/C                 | T/C                 | T/T                 | T/C                 |
| WDR27     | NM_182552    | 170043831                      | A   | C   | A/A                 | A/C                 | A/C                 | A/C                 | A/C                 |
| SMO       | NM_005631    | 128852162                      | A   | G   | A/A                 | A/G                 | A/G                 | A/G                 | A/G                 |
| RIMS2     | NM_001100117 | 104778513                      | C   | G   | C/G                 | C/C                 | C/G                 | C/G                 | C/G                 |
| KIAA0196  | NM_014846    | 126068971                      | C   | T   | C/C                 | C/T                 | C/T                 | C/C                 | C/T                 |
| MAPK15    | NM_139021    | 144801223                      | C   | T   | C/T                 | C/C                 | C/T                 | C/T                 | C/T                 |
| TAF1L     | NM_153809    | 32633036                       | C   | T   | C/C                 | C/T                 | C/T                 | C/T                 | C/T                 |
| TMC1      | NM_138691    | 75445414                       | C   | T   | C/C                 | C/T                 | C/T                 | C/T                 | C/T                 |
| NFIL3     | NM_005384    | 94172680                       | C   | T   | C/T                 | C/C                 | C/T                 | C/C                 | C/T                 |
| SLC2A8    | NM_014580    | 130160385                      | G   | T   | G/G                 | G/T                 | G/T                 | G/T                 | G/T                 |
| OR5P2     | NM_153444    | 7817570                        | G   | C   | G/C                 | G/G                 | G/C                 | G/C                 | G/C                 |
| OR8K3     | NM_001005202 | 56086498                       | C   | T   | C/T                 | C/C                 | C/T                 | C/T                 | C/T                 |
| DBB1      | NM_001923    | 61091561                       | A   | G   | A/A                 | A/G                 | A/G                 | A/G                 | A/G                 |
| LRP1      | NM_002332    | 57599365                       | G   | C   | G/C                 | G/G                 | G/C                 | G/C                 | G/C                 |
| CEP290    | NM_025114    | 88483047                       | C   | T   | C/C                 | C/T                 | C/T                 | C/C                 | C/T                 |
| WDFY2     | NM_052950    | 52234780                       | C   | G   | C/G                 | C/C                 | C/G                 | C/G                 | C/G                 |
| ABCC4     | NM_005845    | 95714964                       | T   | C   | T/T                 | T/C                 | T/C                 | T/C                 | T/C                 |
| ZIC5      | NM_033132    | 100617644                      | C   | T   | C/C                 | C/T                 | C/T                 | C/T                 | C/T                 |
| SLC10A2   | NM_000452    | 103718370                      | C   | T   | C/C                 | C/T                 | C/T                 | C/T                 | C/T                 |
| SPTBN5    | NM_016642    | 42147913                       | G   | A   | G/A                 | G/G                 | G/A                 | G/G                 | G/A                 |
| PLA2G4E   | NM_001080490 | 42279511                       | C   | T   | C/T                 | C/C                 | C/T                 | C/C                 | C/T                 |
| ZNF609    | NM_015042    | 64970626                       | C   | A   | C/C                 | C/A                 | C/A                 | C/A                 | C/A                 |
| FAM192A   | NM_024946    | 57188379                       | A   | T   | A/T                 | A/A                 | A/T                 | A/A                 | A/T                 |
| RI TPR    | NM_001013838 | 67691414                       | A   | G   | A/A                 | A/G                 | A/G                 | A/A                 | A/G                 |
| SRP68     | NM_014230    | 74056418                       | T   | C   | T/T                 | T/C                 |                     | T/T                 | T/C                 |
| FASN      | NM_004104    | 80049154                       | C   | A   | C/A                 | C/C                 | C/A                 | C/C                 | C/A                 |
| ADAMTS10  | NM_030957    | 8661029                        | G   | A   | G/A                 | G/G                 | G/A                 | G/A                 | G/A                 |
| P2RX1     | NM_002558    | 3808223                        | C   | T   | C/T                 | C/T                 | C/T                 | C/T                 | T                   |

**Supplementary Table 4: Hematologic Parameters for DBA Patient with *GATA1* chrX: 48,649,736 Deletion**

|                                                        |                            |                                            |
|--------------------------------------------------------|----------------------------|--------------------------------------------|
| <b>Age (years, months)</b>                             | 6 weeks old                | 3.5 years old                              |
| <b>WBC x 10<sup>9</sup>/L</b>                          | 6.8                        | 9.3                                        |
| <b>ANC X 10<sup>9</sup>/L</b>                          | 1.564                      | 2.697                                      |
| <b>HGB g/dL</b>                                        | 3.5                        | 10.9                                       |
| <b>Platelet x 10<sup>9</sup>/L</b>                     | 362,000                    | 250,000                                    |
| <b>Fetal Hemoglobin %</b>                              | 83.9                       | Not done                                   |
| <b>Erythrocyte Adenosine deaminase EU/g hemoglobin</b> | 0.81                       | Not done                                   |
| <b>Notes</b>                                           | Time of first presentation | Receiving corticosteroids for over 2 years |
